# Supplementary material for: Wavelength dependent photochemical charge transfer at the Cu2O–BiVO4 particle interface – evidence for tandem excitation
Source: Royal Society of Chemistry journal article supplement (doi:10.1039/c8cc04123g), 2018-01-01
Supplement: c8cc04123g1.pdf [file c8cc04123g1.pdf]

## **Electronic Supporting Information**

### **Wavelength Dependent Photochemical Charge Transfer at the Cu<sub>2</sub>O – BiVO<sub>4</sub> Particle Interface – Evidence for Tandem Excitation**

Zongkai Wu, Ghunbong Cheung, Jiarui Wang, Zeqiong Zhao, and Frank E. Osterloh\*

Department of Chemistry, University of California, Davis. One Shields Avenue, Davis, CA, 95616, USA.

#### **EXPERIMENTAL DETAILS**

##### **Chemicals:**

Copper(II) acetylacetonate (Acros Organics, 98%), Acetone (Fisher Scientific, >99.7%), Methanol (Sigma-Aldrich, >99.8%), Bismuth (III) oxide (99.9999% Acros Organics), vanadium(IV) oxide (99+% Strem Chemicals), were used as received. Acetic acid(glacial, Macron) were used after proper dilution. Water was purified to 18 MΩ·cm resistivity by a Nanopure II system.

**Cu<sub>2</sub>O nanoparticles:**<sup>1</sup> Copper(II) acetylacetonate (0.25 g, 1.91 mmol) was suspended in acetone (20 mL). The suspension was sonicated for 30 min and then transferred to a 40 mL Teflon cup in a stainless-steel-lined autoclave. The autoclave was maintained at 140 °C for 24 h and was then allowed to cool to room temperature. The resulting brown product was retrieved by centrifugation, washed three times with 10 mL methanol to remove any starting material, and finally vacuum dried at room temperature overnight. The yield was 91%.

**BiVO<sub>4</sub> Synthesis:** BiVO<sub>4</sub> was synthesized via a revised solid-solution method at room temperature.<sup>2</sup> First, 1.15 g (2.5 mmol) of Bi<sub>2</sub>O<sub>3</sub> and 0.42 g (5 mmol) of VO<sub>2</sub> were vigorously stirred in 25 mL of 1.0 M aqueous acetic acid solution at room temperature for 11 days. The obtained powder was isolated by filtration, and elaborately washed with water, then 0.5 M nitric acid and then water. After vacuum drying the BiVO<sub>4</sub> powder was calcined at 673 K for 5 hours in air to yield 0.76 g (94 %).

To prepare particle films, aqueous dispersions of 0.1 g/L to 0.8 g/L catalysts were drop-coated onto FTO substrates (Thermo Scientific Corporation), dried in air to form thin films, then annealed at 350 °C under Argon for 5h. For the

## ***Electronic Supporting Information***

Cu<sub>2</sub>O-BiVO<sub>4</sub> bilayer, a suspension of Cu<sub>2</sub>O particles in water was drop coated onto FTO substrate first, followed by annealing in argon at 350 °C. Then an aqueous BiVO<sub>4</sub> particle suspension was added on top using the same procedure. Various concentration and number of layers were used to achieve different thickness for both materials.

### **Characterizations**

Transmission electron microscopy (TEM) images were taken with a Philips CM-12 TEM with accelerating voltage of 120 kV. To prepare the samples, aqueous dispersions of the catalyst were dropped onto copper grids with carbon film, and dried in air. Scanning electron microscopy (SEM) images were taken using a Philips XL30 SFEG-SEM microscope operating at an accelerating voltage of 20 kV and using TLD and EBSD detectors. Energy-dispersive X-ray spectroscopy (EDS) were recorded using a FEI Scios Dualbeam FIB/SEM microscope with Oxford MaxN 50 EDS system, with an accelerating voltage of 10 kV. Powder X-ray diffraction patterns were recorded with a Scintag XRD at the wavelength of 0.154 nm, with 2 mm tube slit divergence, 4 mm scatter, 0.5 mm column scatter and 0.2 mm receiving widths. UV-Vis diffuse reflectance spectra were recorded on the thin films pasted on white filter paper using a Thermo Scientific Evolution 220 UV-Vis spectrometer. Film thickness was measured by a Veeco Dektak profilometer.

**Surface photovoltage Spectroscopy (SPS)** measurements were conducted using a vibrating gold Kelvin probe (Delta PHI Besocke) mounted inside a home-built vacuum chamber ( $<1 \times 10^{-14}$  mbar). To prepare the samples, aqueous dispersions of 0.5 mg catalysts were drop-coated onto Au/FTO substrates (Thermo Scientific Corporation), dried in air to form thin films and annealed at 673 K for 5h. Samples were illuminated with monochromatic light from a 150 W Xe lamp filtered through an Oriel Cornerstone 130 monochromator (1-10 mW·cm<sup>-2</sup>). The CPD spectra were corrected for drift effects by subtracting dark scan background.

## Electronic Supporting Information

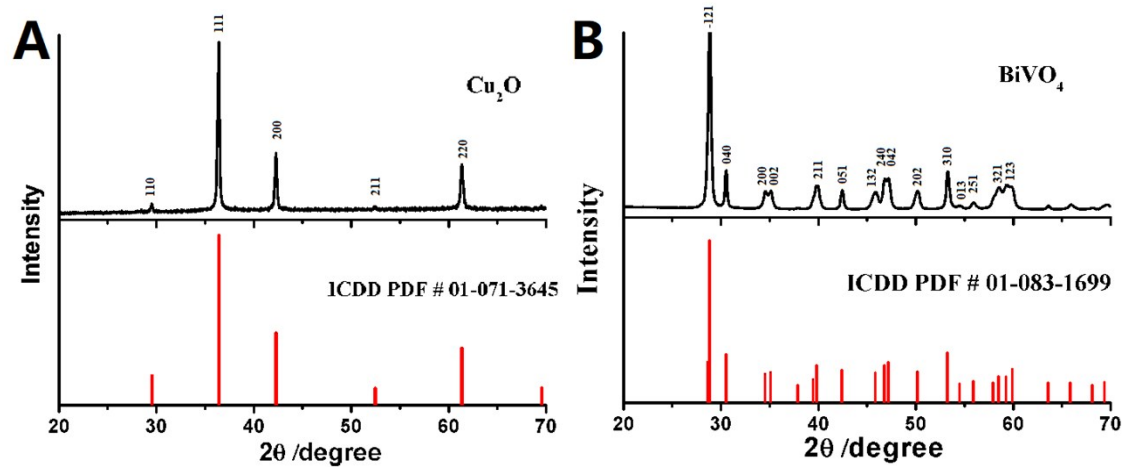

Figure S1. XRD result for (A)  $\text{Cu}_2\text{O}$  nanoparticles and (B)  $\text{BiVO}_4$  nanoparticles

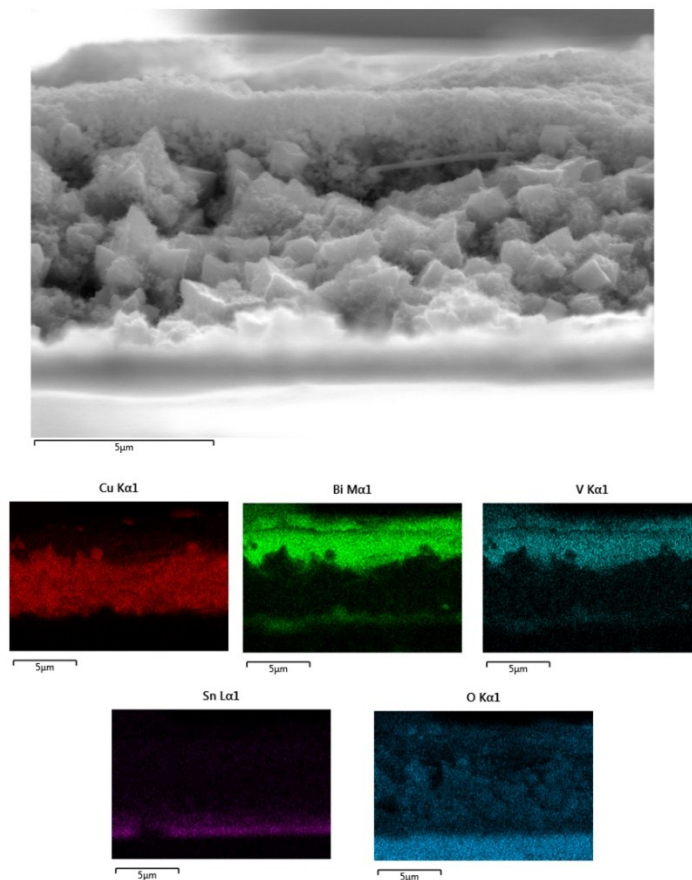

Figure S2. SEM images and EDS elemental mapping for cross section

## Electronic Supporting Information

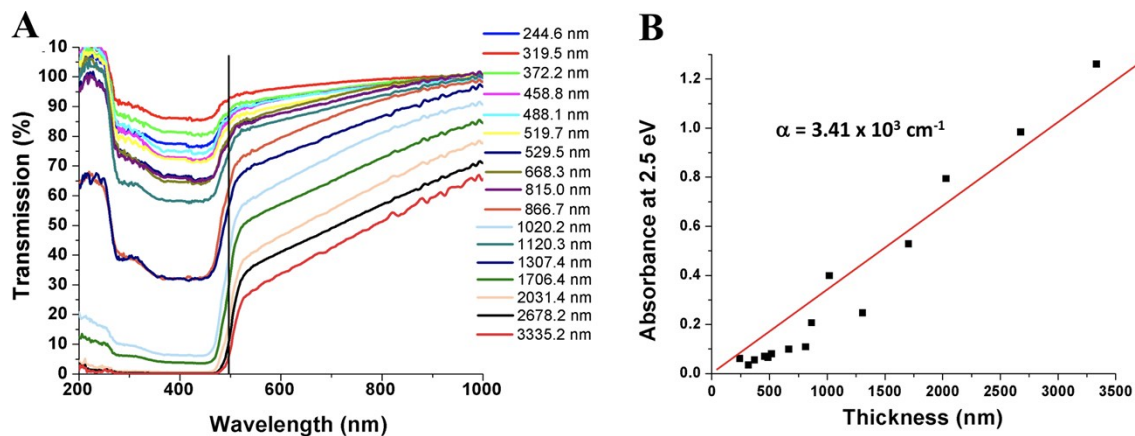

**Figure S3.** A) transmission spectra of BiVO<sub>4</sub> particle layers on glass. B) plot of 2.5 eV absorbance versus particle film thickness as measured by profilometry.

## References

1. Singhal, A.; Pai, M. R.; Rao, R.; Pillai, K. T.; Lieberwirth, I.; Tyagi, A. K., Copper(I) Oxide Nanocrystals - One Step Synthesis, Characterization, Formation Mechanism, and Photocatalytic Properties. *Eur J Inorg Chem* **2013**, (14), 2640-2651.
2. Wang, J. R.; Osterloh, F. E., Limiting factors for photochemical charge separation in BiVO<sub>4</sub>/Co<sub>3</sub>O<sub>4</sub>, a highly active photocatalyst for water oxidation in sunlight. *J Mater Chem A* **2014**, 2 (24), 9405-9411.
